# Supplementary material for: Prediction Model of Hemorrhage Transformation in Patient with Acute Ischemic Stroke Based on Multiparametric MRI Radiomics and Machine Learning
Source: MDPI journal article supplement (doi:10.3390/brainsci12070858), 2022-06-29
Supplement: s1 [file s1]

Article

# Prediction Model of Hemorrhage Transformation in Patient with Acute Ischemic Stroke Based on Multiparametric MRI Radiomics and Machine Learning

Yucong Meng <sup>1,2,†</sup>, Haoran Wang <sup>1,2,†</sup>, Chuanfu Wu <sup>1,2,†</sup>, Xiaoyu Liu <sup>1,2</sup>, Linhao Qu <sup>1,2</sup> and Yonghong Shi <sup>1,2,\*</sup>

<sup>1</sup> Digital Medical Research Center, School of Basic Medical Sciences, Fudan University, Shanghai 200032, China; ycmeng21@m.fudan.edu.cn (Y.M.); hrwang20@fudan.edu.cn (H.W.); cfwu14@fudan.edu.cn (C.W.); liuxiaoyu21@m.fudan.edu.cn (X.L.); lhqu20@fudan.edu.cn (L.Q.)

<sup>2</sup> Shanghai Key Laboratory of Medical Imaging Computing and Computer Assisted Intervention, Shanghai 200032, China

\* Correspondence: yonghong.shi@fudan.edu.cn

† These authors contributed equally to this work.

**Table S1.** Classification accuracy of models with different number of estimators (n\_estimators).

| n_estimators | AUC           | ACC           | SEN           | SPEC          | F1-Score      |
|--------------|---------------|---------------|---------------|---------------|---------------|
| 10           | 0.804 ± 0.015 | 0.803 ± 0.021 | 0.600 ± 0.163 | 0.863 ± 0.055 | 0.571 ± 0.070 |
| 20           | 0.839 ± 0.022 | 0.818 ± 0.000 | 0.733 ± 0.094 | 0.706 ± 0.220 | 0.843 ± 0.028 |
| 30           | 0.861 ± 0.003 | 0.803 ± 0.021 | 0.600 ± 0.000 | 0.863 ± 0.028 | 0.582 ± 0.026 |
| 40           | 0.855 ± 0.006 | 0.833 ± 0.043 | 0.733 ± 0.094 | 0.863 ± 0.028 | 0.667 ± 0.086 |
| 50           | 0.859 ± 0.010 | 0.833 ± 0.043 | 0.733 ± 0.094 | 0.863 ± 0.028 | 0.667 ± 0.086 |
| 60           | 0.867 ± 0.011 | 0.833 ± 0.021 | 0.600 ± 0.000 | 0.902 ± 0.028 | 0.622 ± 0.031 |
| 70           | 0.867 ± 0.006 | 0.864 ± 0.037 | 0.733 ± 0.094 | 0.902 ± 0.028 | 0.709 ± 0.083 |
| 12           | 0.835 ± 0.017 | 0.758 ± 0.021 | 0.800 ± 0.000 | 0.745 ± 0.028 | 0.601 ± 0.021 |
| 80           | 0.867 ± 0.011 | 0.864 ± 0.037 | 0.733 ± 0.094 | 0.902 ± 0.028 | 0.709 ± 0.083 |
| 90           | 0.867 ± 0.020 | 0.833 ± 0.043 | 0.667 ± 0.094 | 0.882 ± 0.048 | 0.646 ± 0.076 |
| 100          | 0.871 ± 0.019 | 0.848 ± 0.021 | 0.733 ± 0.094 | 0.882 ± 0.048 | 0.687 ± 0.029 |
| 200          | 0.855 ± 0.020 | 0.833 ± 0.021 | 0.667 ± 0.094 | 0.882 ± 0.048 | 0.644 ± 0.031 |
| 300          | 0.855 ± 0.015 | 0.833 ± 0.043 | 0.733 ± 0.094 | 0.863 ± 0.028 | 0.667 ± 0.086 |
| 400          | 0.863 ± 0.006 | 0.833 ± 0.043 | 0.733 ± 0.094 | 0.863 ± 0.028 | 0.667 ± 0.086 |
| 500          | 0.863 ± 0.011 | 0.818 ± 0.000 | 0.667 ± 0.094 | 0.863 ± 0.028 | 0.622 ± 0.031 |
| 600          | 0.851 ± 0.011 | 0.833 ± 0.043 | 0.733 ± 0.094 | 0.863 ± 0.028 | 0.667 ± 0.086 |
| 700          | 0.855 ± 0.006 | 0.818 ± 0.037 | 0.667 ± 0.094 | 0.863 ± 0.028 | 0.624 ± 0.076 |
| 800          | 0.855 ± 0.015 | 0.833 ± 0.021 | 0.733 ± 0.094 | 0.863 ± 0.028 | 0.665 ± 0.052 |
| 900          | 0.855 ± 0.006 | 0.818 ± 0.000 | 0.660 ± 0.094 | 0.863 ± 0.028 | 0.622 ± 0.031 |
| 1000         | 0.855 ± 0.006 | 0.818 ± 0.000 | 0.667 ± 0.094 | 0.863 ± 0.028 | 0.622 ± 0.031 |

**Table S2.** Classification accuracy of models with different subtree's max\_depth.

| Max_depth | AUC               | ACC               | SEN               | SPEC              | F1 Score          |
|-----------|-------------------|-------------------|-------------------|-------------------|-------------------|
| 1         | $0.816 \pm 0.022$ | $0.742 \pm 0.021$ | $0.000 \pm 0.000$ | $0.961 \pm 0.028$ | $0.000 \pm 0.000$ |
| 2         | $0.855 \pm 0.006$ | $0.803 \pm 0.057$ | $0.733 \pm 0.189$ | $0.824 \pm 0.127$ | $0.631 \pm 0.027$ |
| 3         | $0.871 \pm 0.000$ | $0.803 \pm 0.021$ | $0.600 \pm 0.000$ | $0.863 \pm 0.028$ | $0.582 \pm 0.026$ |
| 4         | $0.867 \pm 0.015$ | $0.833 \pm 0.021$ | $0.667 \pm 0.094$ | $0.882 \pm 0.048$ | $0.644 \pm 0.031$ |
| 5         | $0.871 \pm 0.019$ | $0.848 \pm 0.021$ | $0.733 \pm 0.094$ | $0.882 \pm 0.048$ | $0.687 \pm 0.029$ |
| 6         | $0.869 \pm 0.017$ | $0.818 \pm 0.037$ | $0.600 \pm 0.000$ | $0.882 \pm 0.048$ | $0.604 \pm 0.050$ |
| 7         | $0.869 \pm 0.017$ | $0.818 \pm 0.037$ | $0.600 \pm 0.000$ | $0.882 \pm 0.048$ | $0.604 \pm 0.050$ |
| 8         | $0.869 \pm 0.017$ | $0.818 \pm 0.037$ | $0.600 \pm 0.000$ | $0.882 \pm 0.048$ | $0.604 \pm 0.050$ |
| 9         | $0.869 \pm 0.017$ | $0.818 \pm 0.037$ | $0.600 \pm 0.000$ | $0.882 \pm 0.048$ | $0.604 \pm 0.050$ |
| 10        | $0.869 \pm 0.017$ | $0.818 \pm 0.037$ | $0.600 \pm 0.000$ | $0.882 \pm 0.048$ | $0.604 \pm 0.050$ |
| None      | $0.869 \pm 0.017$ | $0.818 \pm 0.037$ | $0.600 \pm 0.000$ | $0.882 \pm 0.048$ | $0.604 \pm 0.050$ |
